# Supplementary material for: Ramulus Mori (Sangzhi) Alkaloids Alleviate High-Fat Diet-Induced Obesity and Nonalcoholic Fatty Liver Disease in Mice
Source: MDPI journal article supplement (doi:10.3390/antiox11050905), 2022-05-05
Supplement: s1 [file s1]

# Ramulus Mori (Sangzhi) alkaloids (SZ-A) alleviate high-fat diet-induced obesity and nonalcoholic fatty liver disease in mice

## SUPPLEMENTARY FIGURES

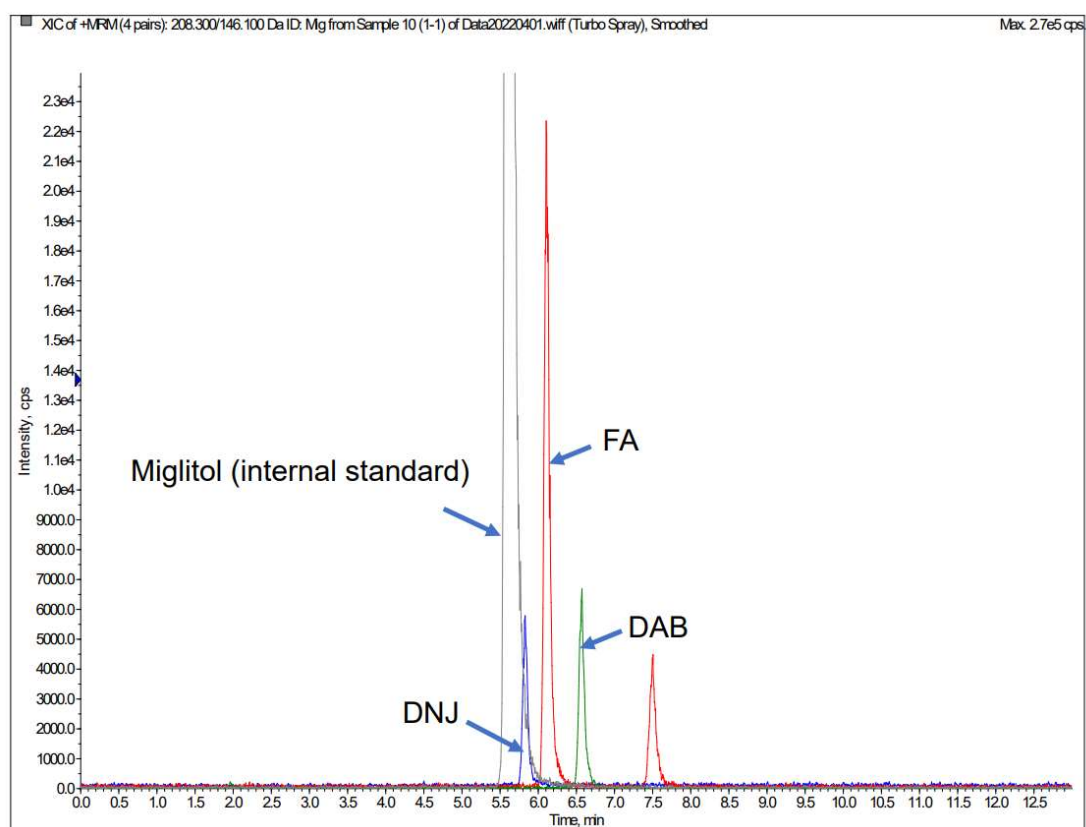

**Figure S1.** The major alkaloids in SZ-A determined using HPLC-MS. Miglitol is the internal standard.
