# Supplementary material for: Ramulus Mori (Sangzhi) Alkaloids Alleviate High-Fat Diet-Induced Obesity and Nonalcoholic Fatty Liver Disease in Mice
Source: Antioxidants (Basel). 2022 May 5;11(5):905. doi: 10.3390/antiox11050905 (PMC9137915; doi:10.3390/antiox11050905)
Supplement: Supplementary file 1 [file antioxidants-11-00905-s001.zip › Table S1 Primers for RT-PCR.xlsx]

## Sheet: Sheet1
	F				R
β-actin	GTGACGTTGACATCCGTAAAGA				GCCGGACTCATCGTACTCC
PPARα	AGAGCCCCATCTGTCCTCTC				ACTGGTAGTCTGCAAAACCAAA
PPARγ	GGAAGACCACTCGCATTCCTT				GTAATCAGCAACCATTGGGTCA
Cd36	GATGACGTGGCAAAGAACAG				TCCTCGGGGTCCTGAGTTAT
Cd68	CTTCCCACAGGCAGCACAG				AATGATGAGAGGCAGCAAGAGG
PGC-1α	ATGAATGCAGCGGTCTTAGC				GGTTTGGCTTGAGCATGTTG
Lgals1	TGCCAGACGGACATGAATTC				CATCCGCCGCCATGTAGT
Lgals3	GGAGAGGGAATGATGTTGCCT				TCCTGCTTCGTGTTACACACA
Col1a1	GCTCCTCTTAGGGGCCACT				CCACGTCTCACCATTGGGG
Col1a2	GGTGAGCCTGGTCAAACGG				ACTGTGTCCTTTCACGCCTTT
Col3a1	CTGTAACATGGAAACTGGGGAAA				CCATAGCTGAACTGAAAACCACC
Col6a3	GCTGCGGAATCACTTTGTGC				CACCTTGACACCTTTCTGGGT
Tnfa	CTTCTGTCTACTGAACTTCGGG				CAGGCTTGTCACTCGAATTTTG
Mcp1	TTAAAAACCTGGATCGGAACCAA				GCATTAGCTTCAGATTTACGGGT
F4/80	ACCACAATACCTACATGCACC				AAGCAGGCGAGGAAAAGATAG
Vim	TTTCTCTGCCTCTGCCAAC				TCTCATTGATCACCTGTCCATC
Timp1	CTCAAAGACCTATAGTGCTGGC				CAAAGTGACGGCTCTGGTAG
MMP9	CTGGACAGCCAGACACTAAAG				CTCGCGGCAAGTCTTCAGAG
MMP2	CAAGTTCCCCGGCGATGTC				TTCTGGTCAAGGTCACCTGTC
adipoR1	AATGGGGCTCCTTCTGGTAAC				GCAGACCTTATACACGAACTCC
adipoR2	GCCAAACACCGATTGGGGT				GGCTCCAAATCTCCTTGGTAGTT
